# Supplementary material
Source: Springer Nature journal article supplement (https://www.springermedizin.de/resource/supplementary/12899_2010_171_MOESM8_ESM.pdf/9514634)

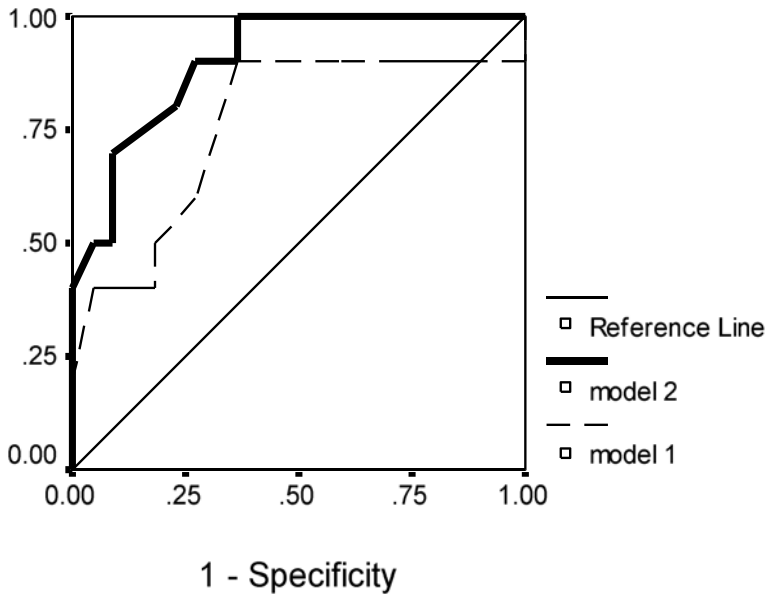

Supplement: MOESM8 [file 9514634]
